RESEARCH ARTICLE

# Delivering HIV Gagp24 to DCIR Induces Strong Antibody Responses *In Vivo*

Anne-Laure Flamar<sup>1,2,3</sup>, Vanessa Contreras<sup>2,4,5,6</sup>, Sandra Zurawski<sup>1,2,3</sup>,  
 Monica Montes<sup>1,2,3</sup>, Nathalie Dereuddre-Bosquet<sup>2,4,5,6</sup>, Frédéric Martinon<sup>2,4,5,6</sup>,  
 Jacques Banchemereau<sup>2,3,7,8,9</sup>, Roger Le Grand<sup>2,4,5,6</sup>, Gerard Zurawski<sup>1,2,3</sup>\*,  
 Yves Levy<sup>2,3,8,9</sup>✉\*

**1** Baylor Institute for Immunology Research, Dallas, Texas, United States of America, **2** Vaccine Research Institute, Créteil, France, **3** INSERM UMR 955, Equipe 16, Créteil, France, **4** CEA, Division of Immuno-Virology, IDMIT Center, Institute for Emerging Diseases and Innovative Therapies, Fontenay-aux-Roses, France, **5** INSERM UMR 1184, Fontenay-aux-Roses, France, **6** Université Paris-Sud 11, Orsay, France, **7** Jackson Laboratory for Genomic Medicine, Farmington, Connecticut, United States of America, **8** Assistance Publique-Hôpitaux de Paris, Groupe Henri-Mondor Albert-Chenevier, service d'immunologie clinique, Créteil, France, **9** Université Paris Est, Faculté de médecine, Créteil, France

✉ These authors contributed equally to this work.

\* [yves.levy@hmn.aphp.fr](mailto:yves.levy@hmn.aphp.fr) (YL); [gerardz@baylorhealth.edu](mailto:gerardz@baylorhealth.edu) (GZ)

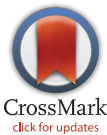

OPEN ACCESS

**Citation:** Flamar A-L, Contreras V, Zurawski S, Montes M, Dereuddre-Bosquet N, Martinon F, et al. (2015) Delivering HIV Gagp24 to DCIR Induces Strong Antibody Responses *In Vivo*. PLoS ONE 10 (9): e0135513. doi:10.1371/journal.pone.0135513

**Editor:** Aftab A. Ansari, Emory University School of Medicine, UNITED STATES

**Received:** March 10, 2015

**Accepted:** July 22, 2015

**Published:** September 25, 2015

**Copyright:** © 2015 Flamar et al. This is an open access article distributed under the terms of the [Creative Commons Attribution License](https://creativecommons.org/licenses/by/4.0/), which permits unrestricted use, distribution, and reproduction in any medium, provided the original author and source are credited.

**Data Availability Statement:** All relevant data are within the paper and its Supporting Information files.

**Funding:** The research was supported by the Agence Nationale de Recherche pour le Sida et hépatites virales through the Vaccine Research Institute programme via a Collaborative Research Agreement (CRA 2007-291)—ALF, VC, SZ, NDB, FM, RL, JB, YL, GZ ([www.anrs.fr](http://www.anrs.fr)). The parental anti-DCIR mAb was developed with support from grants from the National Institutes of Health (U-19 AI-57234) and the generosity of the Baylor Healthcare System through the auspices of the Baylor Research Institute—ALF, SZ, JB, GZ ([www.niaid.nih.gov](http://www.niaid.nih.gov)). The funders

## Abstract

Targeting dendritic cell-specific endocytic receptors using monoclonal antibodies fused to desired antigens is an approach widely used in vaccine development to enhance the poor immunogenicity of protein-based vaccines and to induce immune responses. Here, we engineered an anti-human DCIR recombinant antibody, which cross-reacts with the homologous cynomolgous macaque receptor and was fused via the heavy chain C-terminus to HIV Gagp24 protein ( $\alpha$ DCIR.Gagp24). *In vitro*,  $\alpha$ DCIR.Gagp24 expanded multifunctional antigen-specific memory CD4<sup>+</sup> T cells recognizing multiple Gagp24 peptides from HIV-infected patient peripheral blood mononuclear cells. In non human primates, priming with  $\alpha$ DCIR.Gagp24 without adjuvant elicited a strong anti-Gagp24 antibody response after the second immunization, while in the non-targeted HIV Gagp24 protein control groups the titers were weak. The presence of the double-stranded RNA poly(I:C) adjuvant significantly enhanced the anti-Gagp24 antibody response in all the groups and reduced the discrimination between the different vaccine groups. The avidity of the anti-Gagp24 antibody responses was similar with either  $\alpha$ DCIR.Gagp24 or Gagp24 immunization, but increased from medium to high avidity in both groups when poly(I:C) was co-administered. This data provides a comparative analysis of DC-targeted and non-targeted proteins for their capacity to induce antigen-specific antibody responses *in vivo*. This study supports the further development of DCIR-based DC-targeting vaccines for protective durable antibody induction, especially in the absence of adjuvant.

had no role in study design, data collection and analysis, decision to publish, or preparation of the manuscript.

**Competing Interests:** ALF, SZ, JB and GZ are inventors on an issued patent related to the work described in this study. The Baylor Research Institute has patent filings related to the anti-DCIR Gag p24 vaccine described in this paper at various stages in various countries: specifically they are entitled VACCINES BASED ON TARGETING ANTIGEN TO DCIR EXPRESSED AN ANTIGEN-PRESENTING CELLS with reference numbers 2008214032 Australia, PCT National Phase; 2715044, Canada, PCT National Phase; 10108281.9, Hong Kong, Reregistration of EP/CN; 200880011285.1, China, PCT National Phase; 08728868.4, Germany, France, United Kingdom, EP National Stage; 12164572.5, European Patent Office, Divisional; 200088, Israel, PCT National Phase; 2009-548481, Japan, PCT National Phase; MX/a/2009/008140, Mexico, PCT National Phase; MX/a/2012/002859, Mexico, Divisional; 578696, New Zealand, PCT National Phase; 593450, New Zealand, Divisional; 97104113, Taiwan, Standard; 2009/05347, South Africa, PCT National Phase; 12/024897, 13/234914, 13/872793, 14/045454, USA, Continuation; 13/454404, USA, Divisional. The anti-DCIR Gag p24 vaccine is not currently in clinical development and we confirm that the above patent filing activities do not alter adherence to all PLOS ONE policies on sharing data and materials, as detailed online in your guide for authors. The authors confirm there are no restrictions on sharing of data and/or materials associated with this study other than the requirement for standard Material Transfer Agreements for governing material sharing that would be typical for any academic research institution.

## Introduction

Targeting antigen directly to antigen-presenting cells (APCs), such as dendritic cells (DCs), using recombinant antibodies (rAb) against APC-specific surface receptors fused to desired antigens is a way to increase immunogenicity of protein vaccines and reduce their effective dose. In most DC-targeting studies in mice, the vaccines were administered with a DC-activating agent or an adjuvant to induce potent CD8<sup>+</sup> T cell responses [1–4], although this does not always seem to be necessary for generating antibody responses [5–9]. Poly(I:C), a synthetic double-stranded RNA, has been used as adjuvant with an anti-DEC-205 antibody for inducing antibody responses in non-human primates (NHPs) against a malaria circumsporozoite protein [10] and an human immunodeficiency type 1 virus (HIV-1) Gagp24 (Gagp24) protein [11].

Currently, most vaccines generate protection mainly through induction of antibodies. Studies have shown that the response to Gag is important in the effective cellular immune response to HIV-1 infection, supporting the rationale that HIV-1 Gag is an essential HIV vaccine component [12–14]. These studies demonstrated that Gag-specific responses were the dominant CD4<sup>+</sup> T cell responses to HIV in infected individuals [13]. HIV progressor patients generally have reduced ability to develop an antibody response to Gagp24 antigens, suggesting that delay of clinical manifestations of AIDS may be related to the presence of high levels of Gagp24-specific antibodies [15–17]. Therefore, there is still a need for optimizing immunity by improving adjuvants, vaccine delivery or both. This will hopefully lead in increased durability of cellular and humoral immunity to achieve protection.

In this study, we investigated the effect of delivering HIV Gagp24 protein fused to the heavy chain C-terminus of a recombinant Ab cross-reacting with both human and cynomolgus macaque dendritic cell immunoreceptor (DCIR) [18]. DCIR is expressed on all human APCs and was shown to mediate cross-priming [19] and antigen-presentation to CD4<sup>+</sup> T cells [20]. It is also expressed on monocytes and moderately on isolated epidermal cells from cynomolgus macaques [18]. We show that HIV Gagp24 delivered to APCs *in vitro* via DCIR activates multifunctional antigen-specific memory CD4<sup>+</sup> T cells from HIV-infected individuals. Although, it is well established in animal models that anti-HIV Gagp24 antibodies do not associate with vaccine-induced protection, here we used HIV Gagp24 as model antigen to assess HIV vaccine-induced antibody responses *in vivo*. We compare the magnitude of the HIV Gagp24 antibody responses following vaccination in NHPs with or without poly(I:C) as adjuvant. These data show that targeting antigens to DCIR is a promising means for inducing rapid and sustained antigen-specific antibody responses without the need for adjuvant in the context of both prophylactic and therapeutic vaccines strategies.

## Results

### Production of anti-DCIR.Gagp24 fusion protein

To generate human anti-DCIR.Gagp24 fusion protein, plasmid constructs directing the expression in mammalian cells of a secreted recombinant chimeric mouse anti-human DCIR receptor recombinant antibody (rAb) fused via the heavy chain C-terminus to HIV Gagp24 protein ( $\alpha$ DCIR.Gagp24) were engineered as described [19]. A non-binding isotype matched control IgG4 [21] was also engineered as a negative control (hIgG4.Gagp24) (Fig 1A, left panel). The resulting  $\alpha$ DCIR.Gagp24 and hIgG4.Gagp24 rAbs secreted from stable CHO-S cell lines were purified by protein A affinity (Fig 1A, right panel). As shown by detection of cell surface HIV Gagp24 antigen,  $\alpha$ DCIR.Gagp24 rAb, but not hIgG4.Gagp24 specifically binds to DCIR on HIV-infected patient monocytes and B cells, but not to T cells (Fig 1B).

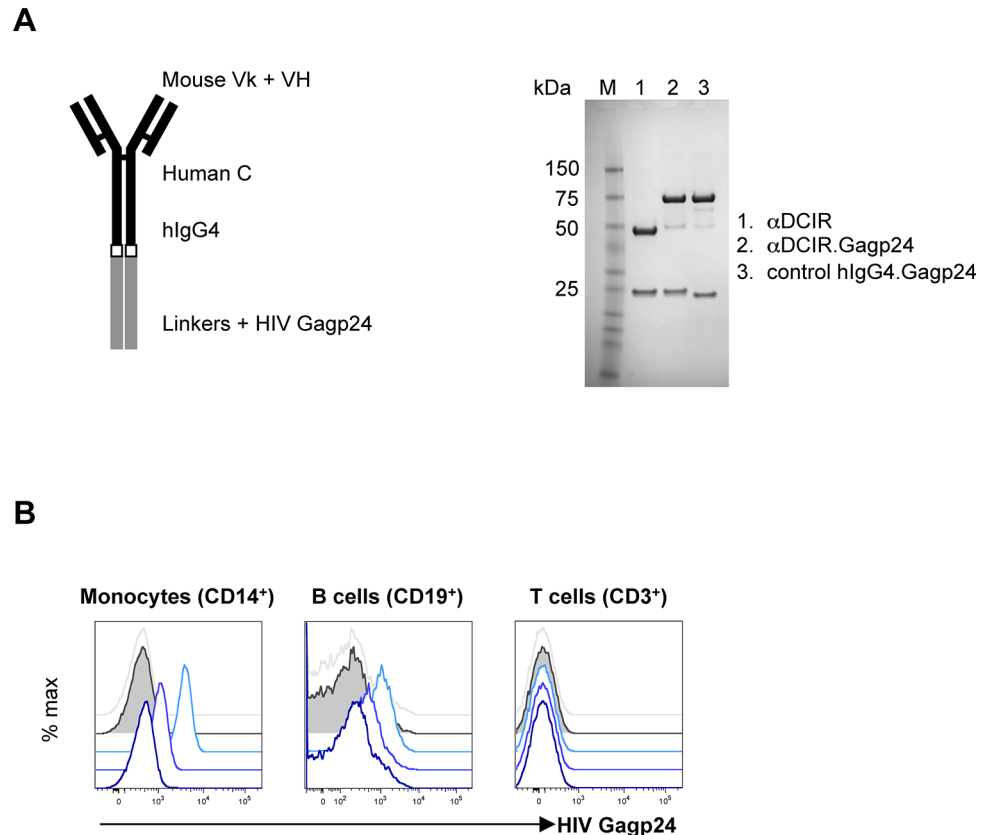

**Fig 1. Characterization of the  $\alpha$ DCIR.Gagp24 fusion rAbs.** **A.** Schematic representation and SDS-PAGE analysis under reducing conditions of the  $\alpha$ DCIR.Gagp24 fusion protein. Expression constructs for chimeric mouse variable (V) region-human IgG4 constant (C) region  $\alpha$ DCIR and isotype control recombinant antibodies (rAbs) were engineered with the HIV Gagp24 coding region fused in frame to the heavy (H) chain C-terminus (left panel). These constructs were co-transfected with a matching light (k) chain expression vector into stable CHO-S cell lines and the secreted fusion rAbs were purified from the culture supernatants by protein A-affinity chromatography and analyzed on reducing SDS-PAGE. Proteins were stained with Coomassie Blue (right panel). **B.** Specific binding of  $\alpha$ DCIR.Gagp24 rAb. Monocytes (left panel), B cells (middle panel) and T cells (right panel) from an HIV-infected patient PBMCs were treated with 3 nM, 0.3 nM and 30 pM of  $\alpha$ DCIR.Gagp24 and 3 nM hIgG4.Gagp24 fusion proteins, followed by incubation with an anti-HIV Gagp24 PE-conjugated antibody and then analyzed by flow cytometry. Blue traces are staining from  $\alpha$ DCIR.Gagp24. The blue color gradient represents the different concentrations from light blue (3 nM) to dark blue (30 pM). Grey traces (staining by 3 nM hIgG4.Gagp24) and grey solid traces (untreated cells) are the background staining. Data are representative of 2 different patients.

doi:10.1371/journal.pone.0135513.g001

### HIV Gagp24 targeted to DCIR is efficiently presented to human CD4<sup>+</sup> T cells *in vitro*

To evaluate the efficacy of presentation of  $\alpha$ DCIR.Gagp24 rAb, PBMCs from an HIV-infected patient were cultured for 10 days with increasing doses of  $\alpha$ DCIR.Gagp24 or isotype control hIgG4.Gagp24 and IFN $\gamma$  secretion was measured after restimulation with pools of 15-mer peptides spanning the HIV Gagp24 protein sequence (Fig 2A). We found that HIV Gagp24 protein was presented through DCIR leading to expansion of memory T cells specific to multiple HIV Gagp24 epitopes (S1 Fig). The isotype control also presented HIV Gagp24 protein to HIV-specific T cells but this presentation was restricted to > 10–100-fold higher doses (S1 Fig). Next, we assayed the type of T cells that were expanded by  $\alpha$ DCIR.Gagp24 rAb. We incubated PBMCs from an HIV-infected patient (patient A15) with 0.3 nM of  $\alpha$ DCIR.Gagp24 or hIgG4.

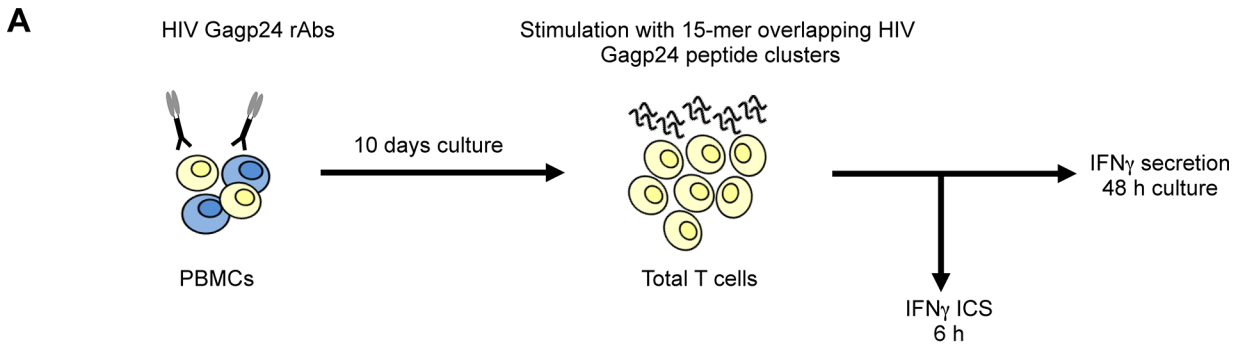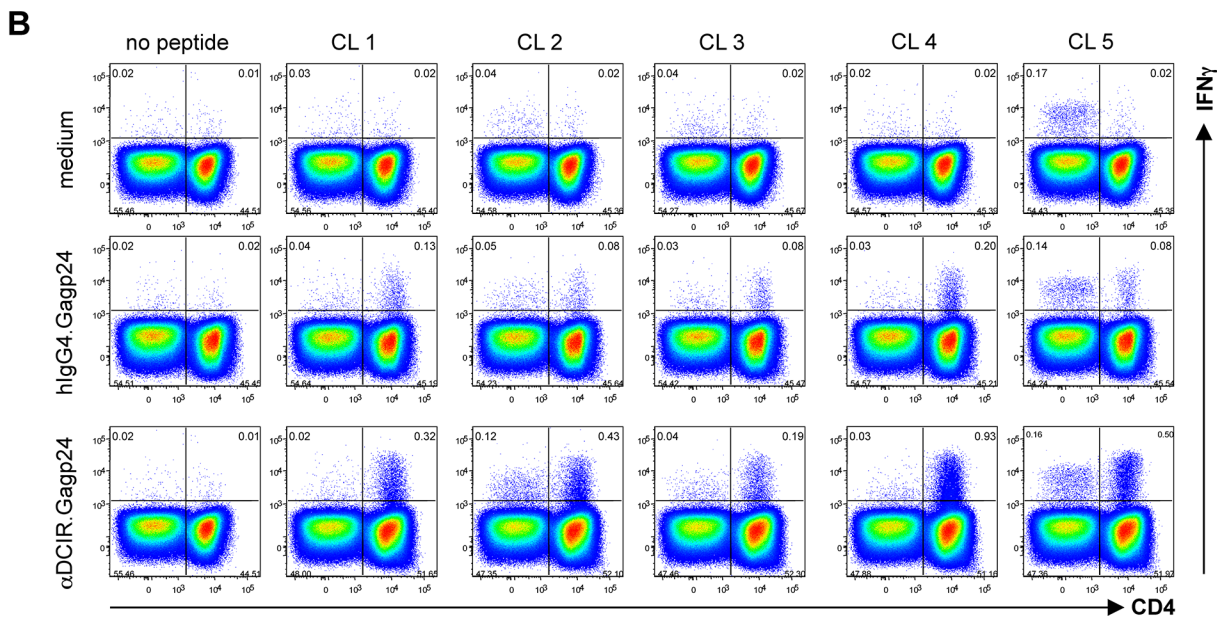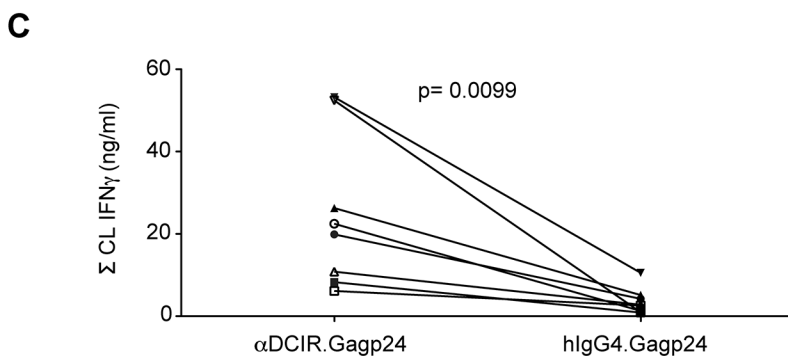

**Fig 2. Low doses of  $\alpha$ DCIR.Gagp24 expand a broad repertoire of HIV Gagp24-specific T cells.** **A.** Experimental procedure. ICS, intracellular staining. **B.** PBMCs from an HIV-infected patient (patient A15) were cultured for 10 days in medium alone (top panel), or with 0.3 nM hlgG4.Gagp24 (middle panel), or 0.3 nM  $\alpha$ DCIR.Gagp24 (lower panel) and then rechallenged for 6 h with or without (-C) 5 clusters (CL) of 15-mer overlapping peptides covering HIV Gagp24 in the presence of brefeldin A prior to intracellular IFN $\gamma$  staining. The flow cytometry profiles are gated on the overall CD3 $^{+}$  T cell population. Data are representative of 4 different patients. **C.** PBMCs from 4 HIV-infected patients (patient A1, A2, A12 and A15) were cultured for 10 days with 0.3 nM (filled symbols) or 30 pM (open symbols) of  $\alpha$ DCIR.Gagp24 or hlgG4.Gagp24 and then restimulated for 48 hrs with 5 clusters (CL) of 15-mer overlapping peptides covering HIV Gagp24. The culture supernatants were then harvested and IFN $\gamma$  produced by total T cells was analyzed by multiplex bead-based assay. Each patient is represented by a different symbol. Data are presented as mean of sum of HIV Gagp24 clusters. Differences between  $\alpha$ DCIR.Gagp24 and hlgG4.Gagp24 were assessed by a matched paired t-test.

doi:10.1371/journal.pone.0135513.g002

Gagp24 for 10 days and then performed intracellular IFN $\gamma$  staining after rechallenge with pools of HIV Gagp24 peptides (Fig 2A and 2B). Although, we did not detect any CD8<sup>+</sup> T cell responses, CD4<sup>+</sup> T cells produced IFN $\gamma$  in response to HIV Gagp24 antigen (Fig 2B). In this particular patient,  $\alpha$ DCIR.Gagp24 expanded CD4<sup>+</sup> T cells specific to all 5 HIV Gagp24 regions we screened (Fig 2B). Moreover,  $\alpha$ DCIR.Gagp24 was more efficient at expanding Gagp24-specific T cells producing IFN $\gamma$  than the isotype control hIgG4.HIV Gagp24 given at the same concentrations (Fig 2B and 2C). Also, in the condition where the cells were not treated with the HIV Gagp24 fusion proteins but were restimulated with pools of HIV Gagp24 peptides, we could detect some expansion of peptide-specific T cells, which is expected in the HIV-infected patient population. In similar experiments with PBMCs from 2 healthy volunteers, no HIV peptide-specific T cells were detected in response to stimulation with  $\alpha$ DCIR.Gagp24 (data not shown). Together these results indicate that a low concentration of  $\alpha$ DCIR.Gagp24 rAb efficiently mediates presentation via DCIR delivery of multiple epitopes within the HIV Gagp24 protein to HIV-specific CD4<sup>+</sup> memory T cells.

### Anti-DCIR.Gagp24 generates multifunctional memory CD4<sup>+</sup> T cells to multiple HIV Gagp24 epitopes *in vitro*

To further characterize the HIV-specific CD4<sup>+</sup> T cells expanded with  $\alpha$ DCIR.Gagp24 rAb, we looked at the antigen-specific cytokine and chemokine production profiles of these T cells after restimulation with clusters of HIV Gagp24 peptides. Thus, in PBMC cultures from one representative HIV-infected patient, most of the HIV-specific-CD4<sup>+</sup> T cells stimulated with  $\alpha$ DCIR.Gagp24 rAb for 10 days co-expressed intracellular IFN $\gamma$ , TNF $\alpha$ , MIP-1 $\beta$  and CD154 (CD40 ligand), in response to stimulation with HIV Gagp24 peptide clusters (Fig 3A). This expansion of HIV Gagp24-specific T cells producing multiple cytokines and chemokines was peptide-specific and strongly enhanced by stimulation with  $\alpha$ DCIR.Gagp24 rAb compared to stimulation with the isotype control hIgG4.Gagp24 (Fig 3A and 3B). Overall, these results show that

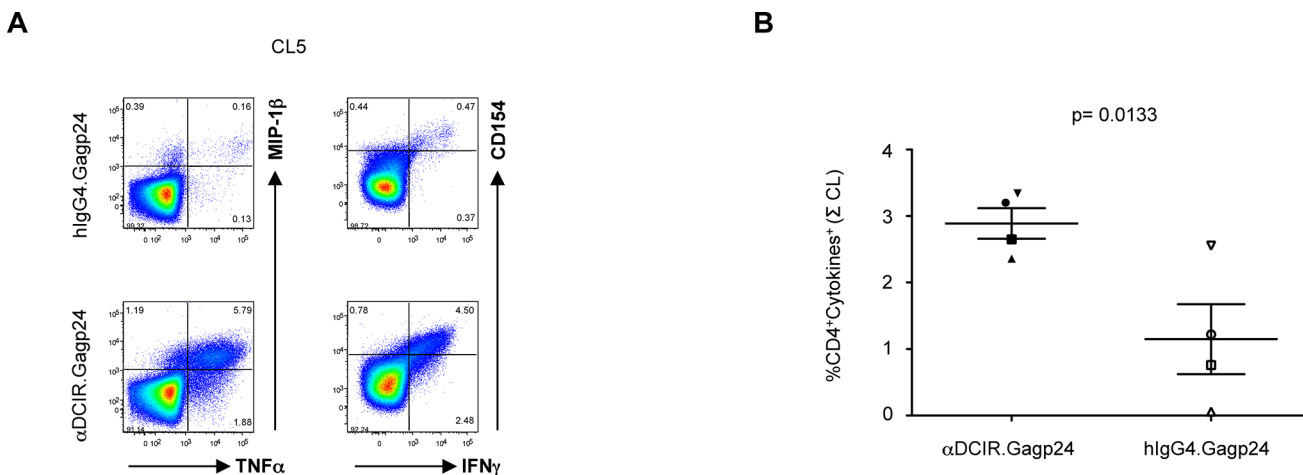

**Fig 3.  $\alpha$ DCIR.Gagp24 expands multifunctional HIV Gagp24-specific CD4<sup>+</sup> T cells *in vitro*.** PBMCs from HIV-infected patients (panel A, patient A15; panel B, patients A2, A1, A15) were cultured for 10 days with 0.3 nM of  $\alpha$ DCIR.Gagp24 or hlgG4.Gag p24 or left unstimulated and then restimulated for 6 hrs with or without clusters of 15-mer overlapping peptides covering HIV Gagp24 in the presence of brefeldin A prior to intracellular cytokine staining. The profiles are gated on the overall CD4<sup>+</sup> T cell populations, with the percentages of populations responding to the designated peptides shown in each plot. **A.** Coordinate analysis of TNF $\alpha$  versus MIP-1 $\beta$ , IFN $\gamma$  or CD154 expression (patient A15). Data are representative of 4 different patients. **B.** Multifunctionality of the cytokine responses. Combined percentages of 5 CD4<sup>+</sup> T cell populations producing different combinations of at least 3 cytokines (IFN $\gamma$ , TNF $\alpha$ , MIP-1 $\beta$  or CD154). Data are presented as mean of sum of HIV Gagp24 clusters  $\pm$  SEM for 3 patients. Differences between  $\alpha$ DCIR.Gagp24 and hlgG4.Gagp24 were assessed by a matched paired t-test.

doi:10.1371/journal.pone.0135513.g003

$\alpha$ DCIR.Gagp24 rAb expands multifunctional HIV peptide-specific memory CD4<sup>+</sup> T cells against a broad range of HIV Gagp24 epitopes.

## Immunization with anti-DCIR.Gagp24 without adjuvant induces strong Gagp24-specific antibody responses in NHPs

To assess the capacity of  $\alpha$ DCIR.Gagp24 rAb to induce Gagp24-specific humoral immune responses *in vivo*, we immunized cynomolgous macaques intradermally (i.d.) with  $\alpha$ DCIR.Gagp24, hIgG4.Gagp24 rAbs or Gagp24 protein with or without poly(I:C) as adjuvant (Table 1). *In vivo* analysis of B cell responses was performed since *in vitro* culture systems used to assess antibody are complex. They require expansion and conversion of memory B cells into antibody-secreting cells by *in vitro* culture using several different stimuli, including Toll-like receptor ligands, pokeweed mitogen, cytokine cocktails, CD40 ligation, and B cell receptor crosslinking [22]. Furthermore, the analysis of antigen-specific human memory B cells has been challenging because they circulate at very low frequencies in peripheral blood, do not secrete antibodies, and proliferate only at a very slow rate under steady-state conditions. The magnitude of the HIV Gagp24 antibody response in serum from immunized macaques was assessed during the course of the study by ELISA. In the absence of adjuvant, serum anti-Gagp24 antibodies were low but detectable 2 weeks after priming (week 2) in all the two groups receiving rAb.Gagp24 (Fig 4A and S2A Fig). At 2 weeks following the first boost (week 8), limiting dilution analysis showed a ~16-fold increase in Gagp24-specific IgG antibody titers in the NHP group immunized with  $\alpha$ DCIR.Gagp24 rAb, while titers in the groups that received hIgG4.Gagp24 rAb or Gagp24 were unchanged (S2A Fig). We observed in all the groups a small decline in the level of anti-Gagp24 antibody responses over the next 6 weeks (weeks 8 to 14) (Fig 4A). The third immunization with  $\alpha$ DCIR.Gagp24 rAb boosted the titers a further 4-fold compared to the maximum peak response obtained at week 8, while the titers in the animals immunized with hIgG4.Gagp24 rAb or Gagp24 remained low (S2A Fig). These data show that  $\alpha$ DCIR.Gagp24 rAb elicits a robust anti-Gagp24 antibody response in the absence of adjuvant *in vivo* compared to hIgG4.Gagp24 rAb or Gagp24 ( $p < 0.005$  in both groups from weeks 8 to 19).

In the presence of poly(I:C), anti-Gagp24 antibody titers 2 weeks after the first injection (week 2) were again low but detectable in the group that received  $\alpha$ DCIR.Gagp24 and hIgG4.Gagp24 rAbs (Fig 4B and S2B Fig). After the first boost (week 8), NHPs immunized with  $\alpha$ DCIR.Gagp24 or hIgG4.Gagp24 rAbs developed similar higher titers of anti-Gagp24 antibodies compared to the group that received Gagp24 (S2B Fig). However, after the third injection (week 17), the magnitude of Gagp24-specific antibody response was further increased in all 3 groups to a similar level (Fig 4B and S2B Fig). These results indicate that poly(I:C) helps the development of antibody responses *in vivo*, but masks the discrimination between the different vaccine groups. To determine the quality of the anti-Gagp24 antibodies at the peak response

**Table 1. Immunization schedules used in this study.**

| Group (no. of monkeys) | Immunization (time point [week])               |
|------------------------|------------------------------------------------|
| Group1 (6)             | $\alpha$ DCIR.Gag24 (week 0; 6; 15)            |
| Group2 (6)             | $\alpha$ DCIR.Gag24+ poly(I:C) (week 0; 6; 15) |
| Group3 (3)             | hIgG4.Gag24 (week 0; 6; 15)                    |
| Group4 (3)             | hIgG4.Gag24+ poly(I:C) (week 0; 6; 15)         |
| Group5 (3)             | Gag24 (week 0; 6; 15)                          |
| Group6 (3)             | Gag24 + poly(I:C) (wk 0; 6; 15)                |

doi:10.1371/journal.pone.0135513.t001

A

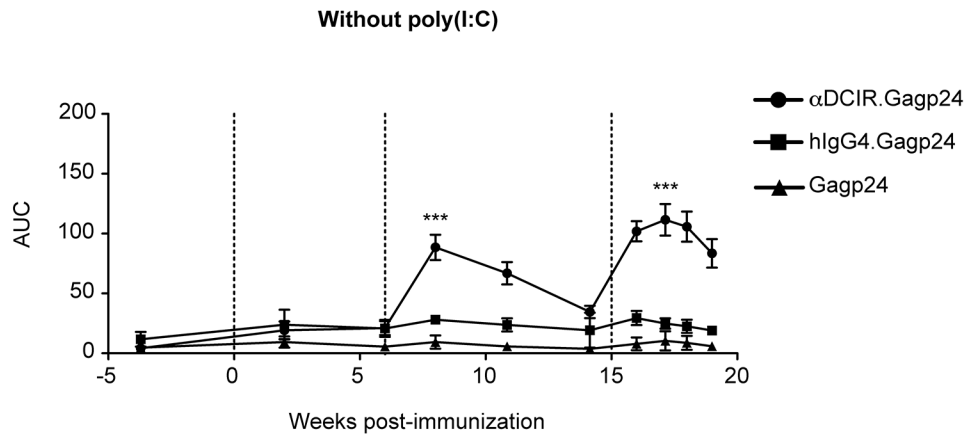

B

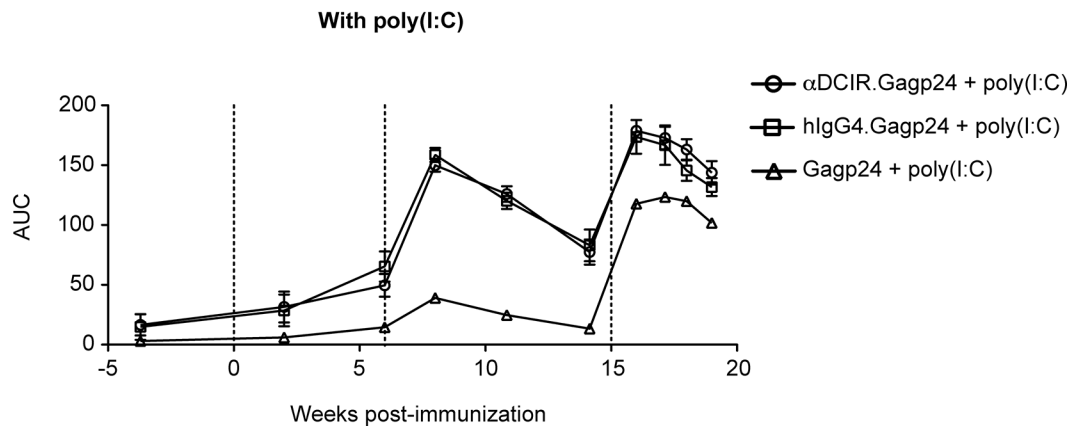

**Fig 4. Immunization with  $\alpha$ DCIR.Gagp24 without adjuvant generates high titers of HIV Gagp24 antibody responses in NHPs.** Animals were immunized i.d. three times at week 0, 6 and 15 with  $\alpha$ DCIR.Gagp24 or control hlgG4.Gagp24 or the molar equivalent of the HIV Gagp24 protein with or without poly(I:C). HIV Gagp24-specific IgG antibodies in serum were assessed at indicated time points post-immunization with  $\alpha$ DCIR.Gagp24 or hlgG4.Gagp24 or Gagp24 without adjuvant (A) or with poly(I:C) (B). Dashed lines indicates times of immunization. The serial measurements of Gagp24-specific antibody responses collected on individual monkeys over time among the vaccine groups were summarized by calculating the area under the titration curves for each monkey at each time point, and longitudinal differences between the vaccine groups were assessed by linear mixed model analysis. Data are presented as mean  $\pm$  SEM. \*,  $p < 0.01$ ; \*\*,  $p < 0.001$ ; \*\*\*,  $p < 0.0001$  compared with hlgG4.Gagp24 and Gagp24 without poly(I:C).

doi:10.1371/journal.pone.0135513.g004

(week 17), we performed ELISA in the presence of the dissociating agent ammonium thiocyanate in order to specifically disrupt lower affinity antigen-antibody binding and thus estimate the relative avidity of the Gagp24-specific antibodies. Low to moderate avidity responses were induced by  $\alpha$ DCIR.Gagp24 or Gagp24 without poly(I:C) (Fig 5A), whereas high avidity responses were observed in animals immunized with  $\alpha$ DCIR.Gagp24 or Gagp24 with poly(I:C) (Fig 5B). Together, these data demonstrate that  $\alpha$ DCIR.Gagp24 rAb induces a strong Gagp24-specific humoral immune response in vivo that can be further enhanced in the presence of adjuvant and this effect is sustained over time.

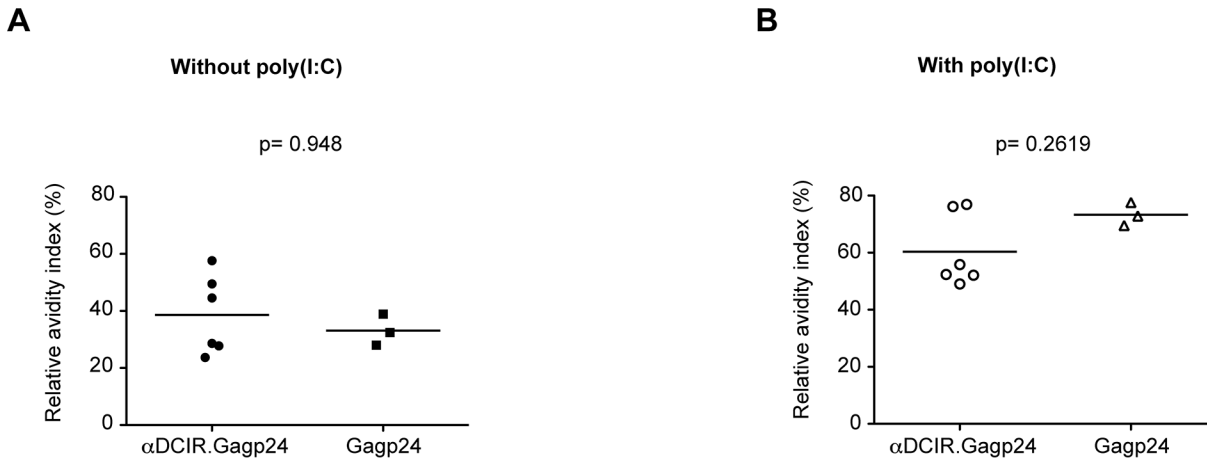

**Fig 5. Anti-HIV Gagp24 antibody avidity following vaccination.** Animals were immunized i.d. three times at week 0, 6 and 15 with  $\alpha$ DCIR.Gagp24 or the molar equivalent of the Gagp24 protein with or without poly(I:C). Serum HIV Gagp24-specific IgG antibody avidity was measured by ELISA 2 weeks after the third injection (week 17) with  $\alpha$ DCIR.Gagp24 or Gagp24 without adjuvant (A) or with poly(I:C) (B). Relative avidity index (RAI) (%) of Gagp24-specific IgG for the individual monkeys is presented.

doi:10.1371/journal.pone.0135513.g005

Animals were immunized i.d. three times with 250  $\mu$ g  $\alpha$ DCIR.Gagp24 (n = 6) or control hIgG4.Gagp24 (n = 3) or the molar equivalent of the HIV Gagp24 protein (n = 3), with or without 250  $\mu$ g poly(I:C).

## Discussion

Over the last decade, studies for improving prophylactic or therapeutic vaccines have focused on specifically delivering antigen to APCs through the linking of antigen to rAb against receptors expressed on APC surfaces. This strategy overcomes laborious *ex vivo* DC manipulation and reinjection into patients to induce antigen-specific immunity [23]. In this present study, we show that HIV Gagp24 protein when delivered to APCs *in vitro* through DCIR is efficiently processed and multiple peptide epitopes are presented resulting in expansion of HIV Gagp24-specific memory CD4<sup>+</sup> T cells from PBMC cultures of HIV-infected individuals. Moreover, these expanded Gagp24-specific CD4<sup>+</sup> T cells produce multiple cytokines in a peptide-specific manner. The isotype control has a reduced effect on antigen-specific CD4<sup>+</sup> T cell expansion, which occurred only when high doses were used. In previous published studies, targeting HIV Gagp24 to the DEC-205 receptor in PBMC cultures from HIV-infected patients expanded antigen-specific CD8<sup>+</sup> T cells, but no HIV Gagp24-specific CD4<sup>+</sup> T cells were detected [24, 25]. Although the HIV-infected individuals we screened exhibited HIV Gagp24-specific CD8<sup>+</sup> T cell responses that were too weak for us to study, another study reported that targeting HIV Gagp24 to DCIR in the presence of Toll-like receptor 7/8 ligands led to induction of antigen-specific CD8<sup>+</sup> T cells from healthy individuals [19]. More recently, our group has reported targeting HIV epitopes *in vitro*, including Gagp24, Gap17, Nef and Pol, to CD40 receptor elicited memory CD4<sup>+</sup> and CD8<sup>+</sup> T cell responses [21]. Therefore, this supports the concept that depending on the cell surface receptor targeted in combination with different adjuvants, distinct types or qualities of immune responses might be generated, as previously observed by others [4, 7, 26, 27].

In this study, we also compare the immunogenicity of targeting HIV Gagp24 to DCIR versus delivering HIV Gagp24 in a non-receptor specific manner *in vivo* in NHPs. Remarkably, our data indicated that a single vaccination with  $\alpha$ DCIR.Gagp24 rAb induced Gagp24-specific IgG



production *in vivo* 2 weeks post-immunization in the absence of adjuvant or apparent sign of DC activation ([19] and unpublished data). The high Gagp24-specific antibody titers obtained after the second immunization with  $\alpha$ DCIR.Gagp24 rAb were only slightly boosted by a third injection ( $p = 0.0625$ ), but were further enhanced by co-injection with poly(I:C) ( $p < 0.0001$ ). This may be a consequence of the high antibody response to first boost being near maximal. Also, we cannot exclude that, with multiple immunizations, the antibodies generated in the primary injections, including antibodies against the human constant region or the mouse variable region of the  $\alpha$ DCIR.Gagp24 antibody would not attenuate the response in the latter vaccinations. In another study where we measured the antibody responses against the targeting vaccine vehicle, they remained lower than the antigen-specific antibody responses even after the third vaccine injection [28]. This issue may also be overcome by delivering the antigen in different forms for the prime or the boost (e.g., DNA or viral vector vaccines). This approach could be used as a component of an effective vaccination strategy for generating some fast-responding memory B cells for future protection against that pathogen. In particular, the HIV Gagp24 antigen can be replaced with carefully designed HIV envelope glycoproteins, in order to induce anti-envelope antibodies with functions such as neutralization and antibody-dependent cell-mediated cytotoxicity, which are certainly highly relevant for vaccine efficacy.

Boosting with  $\alpha$ DCIR.Gagp24 without adjuvant *in vivo* increased Gagp24-specific antibody responses compared to NHPs vaccinated with the isotype control hIgG4.Gagp24 and this difference was sustained over an 11-week period (weeks 8 to 19,  $p < 0.005$ ). However, the similar increased antibody responses observed in both groups in combination with poly(I:C) masks the specific effect of targeting through DCIR. We also noticed that, in the presence of poly(I:C), targeting HIV Gagp24 using an isotype control antibody led to induction of Gagp24-specific antibodies after the first boost that were of higher titers than when HIV Gagp24 protein was delivered alone. However, these differences were less pronounced, especially after the second boost. These antibody-Gagp24 fusion proteins are human IgG4 and were engineered with two additional mutations in the Fc region to abrogate residual human Fc receptor binding [29], however, we cannot rule out the possibility that human IgG4 interacts with the cynomolgous Fc receptor, or that hIgG4.Gagp24, because of its larger size, is intrinsically more immunogenic than the HIV Gagp24 protein alone. It may also be possible that the isotype control hIgG4.Gagp24 rAb is binding and being taken up by other cells in the dermis. To our knowledge, our study also reports for the first time the efficacy of intradermal vaccination of antibody-antigen DC-targeting reagents for induction of HIV-specific humoral immune responses. As previously reported, the human CD14<sup>+</sup> dermal DCs expressing DCIR [19] can promote antibody production by B cells [30]. We also confirmed that poly(I:C) enhances antibody production in NHPs primed with DC-targeted vaccines [11]. In one study where NHPs were primed subcutaneously with  $\alpha$ DEC-205.Gagp24 and poly(I:C) and boosted with recombinant vaccinia virus NYVAC, the avidity of the elicited Gagp24-specific antibodies was lower with the DEC-205-targeted vaccine than with the HIV Gagp24 protein alone [11]. Surprisingly, we found that the avidity of Gagp24-specific antibodies was within the same high avidity range in the NHPs vaccinated with  $\alpha$ DCIR.Gagp24 plus poly(I:C) or Gagp24 plus poly(I:C). Therefore, additional NHP vaccine studies are needed to investigate in more detail different routes of delivery and the characteristics of the elicited antibody such as affinity, avidity, Ig isotype and potential cross-reactivity to different virus clades. Here we show that delivering  $\alpha$ DCIR.Gagp24 *in vivo* resulted in enhanced antigen-specific antibody responses, most likely through specific targeting of DCIR, bypassing the prerequisite for adjuvant, and this offers potential advantages for safety reasons without the secondary effects of adjuvants. The antibody responses to the  $\alpha$ DCIR.Gagp24 construct used herein was able to maintain intact B cells epitopes suggesting that this approach could be applied to other conformational antigens for which antibodies are known to

mediate protection against infection (e.g., Influenza A PR8 hemagglutinin HA1 domain, unpublished data). *In vivo* studies will be undertaken to explore the capacity of  $\alpha$ DCIR antibodies fused to HIV envelope proteins to elicit antigen-specific antibodies.

In conclusion, these findings provide a strong rationale for targeting antigens to DCIR *in vivo* for inducing strong antigen-specific antibody responses without the need for adjuvant and this may have important implications for enhancing vaccine efficacy to protect against many infectious diseases.

## Materials and Methods

### Cloning and production of recombinant anti-human DCIR antibody fused to HIV Gagp24

Mammalian cell vectors directing the secretion of chimeric mouse anti-human DCIR antibody variable regions fused to human IgG4 heavy (H) and light (L) chain constant regions were engineered as described in [19, 29]. The HIV Gagp24 linker is gi|119624034| MHC, class II, DR  $\alpha$  residues 60–75 preceding gi|28872819| Gagp24 [HIV 1] residues 133–363 [29]. The Gagp24 coding region was then transferred to modified pIRES2-DsRed2 transient transfection vectors [19] or vectors for stable transfection of CHO-S cell lines for expression and subsequent purification of  $\alpha$ DCIR.Gagp24 and isotype control hIgG4.Gagp24 using methods described in [27]. Endotoxin levels were 0.01 ng/mg for  $\alpha$ DCIR.Gagp24, 0.09 ng/mg for hIgG4.Gagp24.

### Apheresis samples

Apheresis procedures were performed on highly active anti-retroviral therapy (HAART)-treated HIV-infected patients and healthy HIV-uninfected volunteers after written informed consent was collected. This protocol was reviewed and approved by the Baylor Research Institute Institutional Review Board. The HIV-infected patients enrolled in our study were not selected based on their CD4<sup>+</sup> T cell counts (253–480 cells/ $\mu$ l) but they all controlled their viral load (HIV RNA viral load level < 50 copies/ml) under HAART.

### Preparation of cells

PBMCs were purified from leukapheresis blood samples and used after cryopreservation. PBMCs were enriched from the leukapheresis according to cellular density and size by elutriation (Elutra, CaridianBCT, Lakewood, CO) as per the manufacturer's recommendations.

### HIV Gagp24 peptides

Pools of 11 overlapping (staggered by 4 aa) 15-mer long HIV Gagp24 peptides (Bio-Synthesis, Lewisville, TX) were resuspended in DMSO (Sigma-Aldrich, St. Louis, MO).

### Cell culture and cytokine assay

PBMCs loaded with or without  $\alpha$ DCIR.Gagp24 or isotype control rAbs were cultured for 10 days in complete RPMI 1640 media (Life Technologies, Carlsbad, CA) containing 10% human serum type AB (Gemini Bio-Products, West Sacramento, CA) at 37°C and 5% CO<sub>2</sub>. 100 IU/ml of IL-2 was added on day 2 and fresh media was added every 2 days. On day 10, cultures were restimulated with pools of overlapping 15-mer long HIV Gagp24 peptides at a final concentration of 2  $\mu$ M each and analyzed after 6 h for cell surface markers and intracellular cytokine production as per the standard intracellular cytokine staining assay, or at 48 h for cytokine secretion into the culture supernatants. The secreted cytokines and chemokines were then

measured in the culture supernatants using Luminex multiplex bead-based technology and a Bio-Plex 200 instrument (BioRad, Hercules, CA) according to the manufacturer's instructions.

## Surface and intracellular staining

Briefly, cells were incubated for 6 h at 37°C in 5% CO<sub>2</sub> with pools of overlapping 15-mer long peptides at a final concentration of 2 μM each, stimulated with SEB (Sigma) at 1 μg/ml or left unstimulated (negative control). The secretion inhibitor brefeldin A (Sigma) was added for the final 5 h of culture. After the 6 h incubation, surface staining for CD3-PercP, CD4-PECy7, CD8-PB (unless otherwise stated, staining reagents, instrumentation and software were from BD Biosciences) and live/dead fixable aqua dye (Life Technologies) was performed and then followed by intracellular staining for IFNγ-APC, TNFα-FITC, MIP-1β-PE, CD154-APC-eFluor780 (eBiosciences, San Diego, CA). Analysis was done on a two-laser CANTO II flow cytometer (BD Biosciences) and data analyzed with FlowJo software (TreeStar Inc., Ashland, OR). Spectral compensation was performed for each experiment with each individual mAb used in the surface and intracellular cytokines staining using compensation particles (BD Biosciences).

## Animals

Adult male cynomolgus macaques (*Macaca fascicularis*) (n = 24) imported from Mauritius and weighing 4 to 8 kg were housed at the CEA facility (Fontenay-aux-Roses, France; accreditation no.: B 92-032-02). All experiments were conducted according to the European guidelines for NHP care (EU Directive N 2010/63/EU; investigator accreditation no.: RLG, B 92-073; FM, C 92-241). All animals included in this study were previously confirmed negative for SIV, STLV, Herpes B virus, Filovirus, SRV-1, SRV-2 and measles. Animals were housed in groups, received standard primate feed and fresh fruit daily, and had ad libitum access to water. Cages also contained sources of environmental enrichment such as hiding places, hanging ropes and toys. Before each blood sampling and vaccine injection, animals were sedated with ketamine chlorohydrate (10–15 mg/kg, Rhone-Merieux, Lyon, France). Animal welfare was monitored daily by estimation of food consumption, weight changes and behavior. Animals were euthanized by sedation with ketamine followed by intravenous injection of a lethal dose of sodium pentobarbital. The Regional Animal Care and Use Committee (Comité Régional d'Ethique Ile-de-France Sud, reference 12-013) and the Baylor Research Institute Animal Care and Use Committee (reference A10-015) reviewed and approved this study.

## Immunizations

Animals were immunized i.d. three times with 250 μg αDCIR.Gag24 (n = 6) or control hIgG4.Gagp24 (n = 3) or the molar equivalent of the HIV Gagp24 protein (n = 3) (containing 63 μg of HIV Gagp24 protein), with or without 250 μg poly(I:C). All injections were given in a total volume of 1 ml (10 injections of 100 μL) in a single site i.d. at weeks 0, 6 and 15. High-molecular weight (HMW) poly(I:C) was purchased from InvivoGen (San Diego, CA). HIV Gagp24 protein was obtained from PXT Therapeutics (Grenoble, France).

## ELISA for anti-Gagp24 antibodies

HIV Gagp24-specific IgG antibody titers in serum from vaccinated animals were assessed at indicated time point post-immunization using ELISA. To determine Ag-specific Ab titers, ELISA plates were coated with 2 μg/ml Coh.Gagp24 [29] in 0.2 M sodium carbonate-bicarbonate buffer, pH 9.4. Serial dilutions of serum in 2.5% CBS-K ChemiBlock (Millipore, Billerica,

MA) in Dulbecco's PBS (D-PBS, Life Technologies) were incubated in the wells overnight at 4°C. After washing, plates were incubated with HRP-conjugated goat anti-human IgG (Jackson ImmunoResearch, West Grove, PA) in TBS blocking solution (Thermo Scientific, Rockford, IL) for 2 h at 37°C, then washed and developed with HRP substrate (TMB, Life Technologies), stopped with equal volume of 1N HCl and read at 450 nm. The  $\log_{10}$  transformed and normalized areas under the curves (AUC) data were calculated for each animal at each time point using GraphPad Prism 5 software (GraphPad, La Jolla, CA). For assessment of serum anti-Gagp24 antibody avidity, the anti-Gagp24 ELISA described above was adapted by incubating sera for 20 min at 37°C with 1 M ammonium thiocyanate (NH<sub>4</sub>SCN) pH 6.0 as a dissociating agent to remove low-affinity antibodies as described [31]. The relative avidity index (RAI) was calculated by measurement of sample extinction after NH<sub>4</sub>SCN treatment, multiplied with factor 100 and divided by sample extinction without NH<sub>4</sub>SCN treatment and expressed in percentage (%). A RAI below 40% was considered of low-avidity antibodies, between 40% and 60% represents medium affinity antibodies, while a RAI over 60% is indicative of high-avidity antibodies [32].

### Statistical analyses

Statistical analyses of  $\log_{10}$  transformed antibody AUC data were performed using SAS software (v9.3) (SAS Institute Inc., NC). A linear mixed model analysis, accounting for repeated measures and unequal time point spacing, was employed to test for significant differences in AUC between selected vaccination groups. Comparisons within the same groups of NHPs were assessed using the 2-tailed non-parametric Wilcoxon matched-pair test (GraphPad Prism 5). Comparisons between groups of NHPs were assessed using the 2-tailed non-parametric Mann-Whitney test (GraphPad Prism 5). P values of <0.01 were considered significant for all hypothesis testing.

### Supporting Information

#### **S1 Fig. Breadth of HIV Gag p24-specific T cell responses after stimulation with $\alpha$ DCIR.**

**Gagp24.** PBMCs from 4 HIV-infected patients (patients A1, A2, A12 and A15) were cultured for 10 days with a dose range from 30 pM to 3 nM of  $\alpha$ DCIR.Gagp24 (blue bars, left panels) or hIgG4.Gag p24 (grey bars, right panels) or left unstimulated (unfilled bars) and restimulated for 48 hrs with or without (-C) 5 clusters (CL) of 15-mer overlapping peptides covering HIV Gagp24. The culture supernatants were then harvested and IFN $\gamma$  secreted by total T cells was analyzed by multiplex bead-based assay. From left to right, concentrations are: 3 nM, 0.3 nM and 30 pM. Data are presented as mean  $\pm$  SEM.

(TIF)

**S2 Fig. Serum anti-HIV Gagp24 antibody titers after vaccination.** Animals were immunized i.d. three times at week 0, 6 and 15 with  $\alpha$ DCIR.Gag24 or control hIgG4.Gagp24 or the molar equivalent of the Gagp24 protein with or without poly(I:C). HIV Gagp24-specific IgG antibody titers in serum were measured by ELISA at indicated time points post-immunization with  $\alpha$ DCIR.Gagp24 or hIgG4.Gagp24 or Gagp24 without adjuvant (A) or with poly(I:C) (B). Data are presented as mean  $\pm$  SEM.

(TIF)

### Acknowledgments

We thank Dr. Ralph Steinman for kindly providing HIV Gagp24. We thank the patients from the Baylor University Medical Center and Bryan King and Dr. Louis Sloan from North Texas

Infectious Diseases Consultants for their help with patients and interest, Peter Klucar for some protein purifications, the Luminex core, Lynnette Walters for the processing of the cells and Dr. Jason Skinner for help with the statistical analysis. We thank Dr. Christophe Joubert, veterinarian, Dr. Isabelle Mangeot, as well as the staff of the “Therapies Innovantes et Prevention des Infections Virales” (TIPIV) core laboratory of Division of Immuno-virology, for expert husbandry and technical assistance with the vaccinations. The IDMIT infrastructure used for the animal studies is part of the “Programme d’Investissements d’Avenir” of the French Government.

## Author Contributions

Conceived and designed the experiments: ALF SZ JB YL RL GZ. Performed the experiments: ALF VC SZ MM NDB FM. Analyzed the data: ALF VC SZ FM RL YL GZ. Contributed reagents/materials/analysis tools: ALF SZ GZ. Wrote the paper: ALF RL YL GZ.

## References

1. Bonifaz L, Bonnyay D, Mahnke K, Rivera M, Nussenzweig MC, Steinman RM. Efficient targeting of protein antigen to the dendritic cell receptor DEC-205 in the steady state leads to antigen presentation on major histocompatibility complex class I products and peripheral CD8+ T cell tolerance. *J Exp Med* 2002, 196:1627–1638. PMID: [12486105](#)
2. Bonifaz LC, Bonnyay DP, Charalambous A, Darguste DI, Fujii S, Soares H, et al. In vivo targeting of antigens to maturing dendritic cells via the DEC-205 receptor improves T cell vaccination. *J Exp Med* 2004, 199:815–824. PMID: [15024047](#)
3. Boscardin SB, Hafalla JC, Masilamani RF, Kamphorst AO, Zebroski HA, Rai U, et al. Antigen targeting to dendritic cells elicits long-lived T cell help for antibody responses. *J Exp Med* 2006, 203:599–606. PMID: [16505139](#)
4. Carter RW, Thompson C, Reid DM, Wong SY, Tough DF. Preferential induction of CD4+ T cell responses through in vivo targeting of antigen to dendritic cell-associated C-type lectin-1. *J Immunol* 2006, 177:2276–2284. PMID: [16887988](#)
5. He LZ, Crocker A, Lee J, Mendoza-Ramirez J, Wang XT, Vitale LA, et al. Antigenic targeting of the human mannose receptor induces tumor immunity. *J Immunol* 2007, 178:6259–6267. PMID: [17475854](#)
6. Caminschi I, Proietto AI, Ahmet F, Kitsoulis S, Shin Teh J, Lo JC, et al. The dendritic cell subtype-restricted C-type lectin Clec9A is a target for vaccine enhancement. *Blood* 2008, 112:3264–3273. doi: [10.1182/blood-2008-05-155176](#) PMID: [18669894](#)
7. Lahoud MH, Ahmet F, Kitsoulis S, Wan SS, Vremec D, Lee CN, et al. Targeting antigen to mouse dendritic cells via Clec9A induces potent CD4 T cell responses biased toward a follicular helper phenotype. *J Immunol* 2011, 187:842–850. doi: [10.4049/jimmunol.1101176](#) PMID: [21677141](#)
8. Park HY, Light A, Lahoud MH, Caminschi I, Tarlinton DM, Shortman K. Evolution of B cell responses to Clec9A-targeted antigen. *J Immunol* 2013, 191:4919–4925. doi: [10.4049/jimmunol.1301947](#) PMID: [24123689](#)
9. Chappell CP, Draves KE, Giltiay NV, Clark EA. Extrafollicular B cell activation by marginal zone dendritic cells drives T cell-dependent antibody responses. *J Exp Med* 2012, 209:1825–1840. PMID: [22966002](#)
10. Tewari K, Flynn BJ, Boscardin SB, Kastenmueller K, Salazar AM, Anderson CA, et al. Poly(I:C) is an effective adjuvant for antibody and multi-functional CD4+ T cell responses to Plasmodium falciparum circumsporozoite protein (CSP) and alphaDEC-CSP in non human primates. *Vaccine* 2010, 28:7256–7266. doi: [10.1016/j.vaccine.2010.08.098](#) PMID: [20846528](#)
11. Flynn BJ, Kastenmuller K, Wille-Reece U, Tomaras GD, Alam M, Lindsay RW, et al. Immunization with HIV Gag targeted to dendritic cells followed by recombinant New York vaccinia virus induces robust T-cell immunity in nonhuman primates. *Proc Natl Acad Sci U S A* 2011, 108:7131–7136. doi: [10.1073/pnas.1103869108](#) PMID: [21467219](#)
12. Edwards BH, Bansal A, Sabbaj S, Bakari J, Mulligan MJ, Goepfert PA. Magnitude of functional CD8+ T-cell responses to the gag protein of human immunodeficiency virus type 1 correlates inversely with viral load in plasma. *J Virol* 2002, 76:2298–2305. PMID: [11836408](#)
13. Ramduth D, Chetty P, Mngquandiso NC, Nene N, Harlow JD, Honeyborne I, et al. Differential immunogenicity of HIV-1 clade C proteins in eliciting CD8+ and CD4+ cell responses. *J Infect Dis* 2005, 192:1588–1596. PMID: [16206073](#)

14. Kiepiela P, Ngumbela K, Thobakgale C, Ramduth D, Honeyborne I, Moodley E, et al. CD8+ T-cell responses to different HIV proteins have discordant associations with viral load. *Nat Med* 2007, 13:46–53. PMID: [17173051](#)
15. Hogervorst E, Jurriaans S, de Wolf F, van Wijk A, Wiersma A, Valk M, et al. Predictors for non- and slow progression in human immunodeficiency virus (HIV) type 1 infection: low viral RNA copy numbers in serum and maintenance of high HIV-1 p24-specific but not V3-specific antibody levels. *J Infect Dis* 1995, 171:811–821. PMID: [7706807](#)
16. Strathdee SA, Frank JW, McLaughlin J, Leblanc M, Major C, O'Shaughnessy MV, et al. Quantitative measures of human immunodeficiency virus-specific antibodies predict progression to AIDS. *J Infect Dis* 1995, 172:1375–1379. PMID: [7594682](#)
17. Binley JM, Klasse PJ, Cao Y, Jones I, Markowitz M, Ho DD, et al. Differential regulation of the antibody responses to Gag and Env proteins of human immunodeficiency virus type 1. *J Virol* 1997, 71:2799–2809. PMID: [9060635](#)
18. Romain G, van Gulck E, Epaulard O, Oh S, Li D, Zurawski G, et al. CD34-derived dendritic cells transfected ex vivo with HIV-Gag mRNA induce polyfunctional T-cell responses in nonhuman primates. *Eur J Immunol* 2012, 42:2019–2030. doi: [10.1002/eji.201242478](#) PMID: [22585548](#)
19. Klechevsky E, Flamar AL, Cao Y, Blanck JP, Liu M, O'Bar A, et al. Cross-priming CD8+ T cells by targeting antigens to human dendritic cells through DCIR. *Blood* 2010, 116:1685–1697. doi: [10.1182/blood-2010-01-264960](#) PMID: [20530286](#)
20. Meyer-Wentrup F, Benitez-Ribas D, Tacke PJ, Punt CJ, Figdor CG, de Vries IJ, et al. Targeting DCIR on human plasmacytoid dendritic cells results in antigen presentation and inhibits IFN-alpha production. *Blood* 2008, 111:4245–4253. doi: [10.1182/blood-2007-03-081398](#) PMID: [18258799](#)
21. Flamar AL, Xue Y, Zurawski SM, Montes M, King B, Sloan L, et al. Targeting concatenated HIV antigens to human CD40 expands a broad repertoire of multifunctional CD4+ and CD8+ T cells. *Aids* 2013, 27:2041–2051. doi: [10.1097/QAD.0b013e3283624305](#) PMID: [23615121](#)
22. Franz B, May KF Jr., Dranoff G, Wucherpfennig K. Ex vivo characterization and isolation of rare memory B cells with antigen tetramers. *Blood* 2011, 118:348–357. doi: [10.1182/blood-2011-03-341917](#) PMID: [21551230](#)
23. Cobb A, Roberts LK, Palucka AK, Mead H, Montes M, Ranganathan R, et al. Development of a HIV-1 lipopeptide antigen pulsed therapeutic dendritic cell vaccine. *J Immunol Methods* 2011, 365:27–37. doi: [10.1016/j.jim.2010.11.002](#) PMID: [21093448](#)
24. Cheong C, Choi JH, Vitale L, He LZ, Trumfheller C, Bozzacco L, et al. Improved cellular and humoral immune responses in vivo following targeting of HIV Gag to dendritic cells within human anti-human DEC205 monoclonal antibody. *Blood* 2010, 116:3828–3838. doi: [10.1182/blood-2010-06-288068](#) PMID: [20668230](#)
25. Bozzacco L, Trumfheller C, Siegal FP, Mehandru S, Markowitz M, Carrington M, et al. DEC-205 receptor on dendritic cells mediates presentation of HIV gag protein to CD8+ T cells in a spectrum of human MHC I haplotypes. *Proc Natl Acad Sci U S A* 2007, 104:1289–1294. PMID: [17229838](#)
26. Dudziak D, Kamphorst AO, Heidkamp GF, Buchholz VR, Trumfheller C, Yamazaki S, et al. Differential antigen processing by dendritic cell subsets in vivo. *Science* 2007, 315:107–111. PMID: [17204652](#)
27. Li D, Romain G, Flamar AL, Duluc D, Dullaers M, Li XH, et al. Targeting self- and foreign antigens to dendritic cells via DC-ASGPR generates IL-10-producing suppressive CD4+ T cells. *J Exp Med* 2012, 209:109–121. doi: [10.1084/jem.20110399](#) PMID: [22213806](#)
28. Epaulard O, Adam L, Poux C, Zurawski G, Salabert N, Rosenbaum P, et al. Macrophage- and neutrophil-derived TNF-alpha instructs skin langerhans cells to prime antiviral immune responses. *J Immunol* 2014, 193:2416–2426. doi: [10.4049/jimmunol.1303339](#) PMID: [25057007](#)
29. Flamar AL, Zurawski S, Scholz F, Gayet I, Ni L, Li XH, et al. Noncovalent assembly of anti-dendritic cell antibodies and antigens for evoking immune responses in vitro and in vivo. *J Immunol* 2012, 189:2645–2655. doi: [10.4049/jimmunol.1102390](#) PMID: [22865916](#)
30. Klechevsky E, Morita R, Liu M, Cao Y, Coquery S, Thompson-Snipes L, et al. Functional specializations of human epidermal Langerhans cells and CD14+ dermal dendritic cells. *Immunity* 2008, 29:497–510. doi: [10.1016/j.immuni.2008.07.013](#) PMID: [18789730](#)
31. Almanzar G, Ottensmeier B, Liese J, Prelog M. Assessment of IgG avidity against pertussis toxin and filamentous hemagglutinin via an adapted enzyme-linked immunosorbent assay (ELISA) using ammonium thiocyanate. *J Immunol Methods* 2013, 387:36–42. doi: [10.1016/j.jim.2012.09.008](#) PMID: [23022630](#)
32. Kneitz RH, Schubert J, Tollmann F, Zens W, Hedman K, Weissbrich B. A new method for determination of varicella-zoster virus immunoglobulin G avidity in serum and cerebrospinal fluid. *BMC Infect Dis* 2004, 4:33. PMID: [15355548](#)
